# Supplementary material for: Association of Opioid Use Disorder Treatment With Alcohol-Related Acute Events
Source: PubMed Central journal article supplement (PMC7905500; doi:10.1001/jamanetworkopen.2021.0061), 2021-02-24
Supplement: jamanetwopen-e210061-s001.pdf [file jamanetwopen-e210061-s001.pdf]

## Supplemental Online Content

Xu KY, Presnall N, Mintz CM, et al. Association of opioid use disorder treatment with alcohol-related acute events. *JAMA Netw Open*. 2021;4(2):e210061. doi:10.1001/jamanetworkopen.2021.0061

**eTable 1.** Classification of Medications Commonly Found in Association With Alcohol Poisoning

**eTable 2.** Odds of Alcohol-Related Acute Events Associated with OUD Medication Treatment Days Without Adjustment for Treatment Days Encompassing Medications Commonly Found in Association With Alcohol Poisoning

**eTable 3.** Odds of Alcohol-Related Acute Events Associated With OUD Medication Treatment Days, With Adjustment for Treatment Days Encompassing Medications Commonly Found in Association with Alcohol Poisoning

**eFigure.** Overview of Case-Crossover Design

This supplemental material has been provided by the authors to give readers additional information about their work.

**eTable 1.** Classification of Medications Commonly Found in Association With Alcohol Poisoning

| Opioids     |              |               |
|-------------|--------------|---------------|
| Fentanyl    | Opium        | Hydrocodone   |
| Morphine    | Propoxyphene | Hydromorphone |
| Oxycodone   | Meperidine   |               |
| Oxymorphone | Tramadol     |               |

| Muscle Relaxants |               |                 |
|------------------|---------------|-----------------|
| Carisoprodol     | Methocarbamol | Metaxalone      |
| Chlorzoxazone    | Orphenadrine  | Cyclobenzaprine |

| Nonsteroidal anti-inflammatory drugs (NSAIDs) |               |            |
|-----------------------------------------------|---------------|------------|
| Aspirin                                       | Ketoprofen    | Fenoprofen |
| Diclofenac                                    | Meclofenamate | Naproxen   |
| Diflunisal                                    | Mefenamic     | Ibuprofen  |
| Etodolac                                      | Meloxicam     | Nabumetone |
| Oxaprozin                                     | Piroxicam     | Sulindac   |
| Tolmetin                                      | Indomethacin  |            |

| Antidepressants |                 |                 |
|-----------------|-----------------|-----------------|
| Desipramine     | Fluoxetine      | Fluvoxamine     |
| Amitriptyline   | Bupropion       | Mirtazapine     |
| Nortriptyline   | Sertraline      | Citalopram      |
| Clomipramine    | Paroxetine      | Escitalopram    |
| Trazodone       | Venlafaxine     | Duloxetine      |
| Nefazodone      | Desvenlafaxine  | Vilazodone      |
| Atomoxetine     | Phenelzine      | Selegiline      |
| Vortioxetine    | Tranylcypromine | Levomilnacipran |

| Mood Stabilizers |               |               |
|------------------|---------------|---------------|
| Lithium          | Lamotrigine   | Carbamazepine |
| Valproic Acid    | Oxcarbazepine | Topiramate    |

| Benzodiazepines |                  |             |
|-----------------|------------------|-------------|
| Alprazolam      | Midazolam        | Quazepam    |
| Lorazepam       | Clonazepam       | Zolpidem    |
| Oxazepam        | Diazepam         | Eszopiclone |
| Triazolam       | Chlordiazepoxide | Zaleplon    |
| Estazolam       | Clobazam         |             |
| Temazepam       | Flurazepam       |             |

**eTable 2.** Odds of Alcohol-Related Acute Events Associated With OUD Medication Treatment Days, Without Adjustment for Treatment Days Encompassing Medications Commonly Found in Association With Alcohol Poisoning

|            |                                            | <b>All Participants<br/>(8424214 Person-Days among 13335 Unique Individuals)</b>            |                          |      |
|------------|--------------------------------------------|---------------------------------------------------------------------------------------------|--------------------------|------|
|            | Effect                                     | Odds Ratio                                                                                  | 95% Confidence Intervals |      |
| Model 2A.1 | Buprenorphine Treatment Days               | 0.56                                                                                        | 0.52                     | 0.61 |
|            | Methadone Treatment Days                   | 0.34                                                                                        | 0.26                     | 0.45 |
|            | Naltrexone Extended Release Treatment Days | 0.62                                                                                        | 0.51                     | 0.74 |
|            | Naltrexone Oral Treatment Days             | 0.79                                                                                        | 0.72                     | 0.87 |
|            |                                            | <b>OUD with Recent AUD Claims<br/>(4629076 Person-Days among 7462 Unique Individuals)</b>   |                          |      |
|            | Effect                                     | Odds Ratio                                                                                  | 95% Confidence Intervals |      |
| Model 2A.2 | Buprenorphine Treatment Days               | 0.40                                                                                        | 0.36                     | 0.45 |
|            | Methadone Treatment Days                   | 0.30                                                                                        | 0.20                     | 0.45 |
|            | Naltrexone Extended Release Treatment Days | 0.55                                                                                        | 0.44                     | 0.68 |
|            | Naltrexone Oral Treatment Days             | 0.74                                                                                        | 0.66                     | 0.83 |
|            |                                            | <b>OUD without Recent AUD Claims<br/>3795138 Person-Days among 5873 Unique Individuals)</b> |                          |      |
|            | Effect                                     | Odds Ratio                                                                                  | 95% Confidence Intervals |      |
| Model 2A.3 | Buprenorphine Treatment Days               | 0.73                                                                                        | 0.65                     | 0.82 |
|            | Methadone Treatment Days                   | 0.37                                                                                        | 0.25                     | 0.53 |
|            | Naltrexone Extended Release Treatment Days | 0.75                                                                                        | 0.53                     | 1.07 |
|            | Naltrexone Oral Treatment Days             | 0.85                                                                                        | 0.68                     | 1.05 |

eTable 2 shows the unadjusted odds of alcohol-related acute events associated with OUD medication treatment days via three models: model 2A.1 (all participants), model 2A.2 (individuals with OUD and recent AUD claims), and model 2A.3 (individuals with OUD but without recent AUD claims). Odds ratios and 95% confidence intervals are denoted for each variable.

**eTable 3.** Odds of Alcohol-Related Acute Events Associated With OUD Medication Treatment Days, With Adjustment for Treatment Days Encompassing Medications Commonly Found in Association with Alcohol Poisoning

|            |                                                    | <b>All Participants<br/>(8424214 Person-Days among 13335 Unique Individuals)</b>            |                          |      |
|------------|----------------------------------------------------|---------------------------------------------------------------------------------------------|--------------------------|------|
|            | Effect                                             | Odds Ratio                                                                                  | 95% Confidence Intervals |      |
| Model 2B.1 | Buprenorphine Treatment Days                       | 0.57                                                                                        | 0.52                     | 0.61 |
|            | Methadone Treatment Days                           | 0.34                                                                                        | 0.26                     | 0.45 |
|            | Naltrexone Extended Release Treatment Days         | 0.63                                                                                        | 0.52                     | 0.76 |
|            | Naltrexone Oral Treatment Days                     | 0.84                                                                                        | 0.76                     | 0.93 |
|            | Muscle Relaxant Treatment Days                     | 1.15                                                                                        | 1.05                     | 1.27 |
|            | Antispasmodic Treatment Days                       | 1.08                                                                                        | 0.88                     | 1.34 |
|            | Opioid (Non Buprenorphine) Treatment Days          | 0.98                                                                                        | 0.92                     | 1.04 |
|            | Antidepressant Treatment Days                      | 0.89                                                                                        | 0.85                     | 0.93 |
|            | Mood stabilizer Treatment Days                     | 0.85                                                                                        | 0.79                     | 0.92 |
|            | Antipsychotic Treatment Days                       | 0.83                                                                                        | 0.78                     | 0.88 |
|            | Nonsteroidal anti-inflammatory drug Treatment Days | 0.97                                                                                        | 0.89                     | 1.05 |
|            | Benzodiazepine Treatment Days                      | 1.45                                                                                        | 1.37                     | 1.54 |
|            |                                                    | <b>OUD with Recent AUD Claims<br/>(4629076 Person-Days among 7462 Unique Individuals)</b>   |                          |      |
|            | Effect                                             | Odds Ratio                                                                                  | 95% Confidence Intervals |      |
| Model 2B.2 | Buprenorphine Treatment Days                       | 0.41                                                                                        | 0.36                     | 0.46 |
|            | Methadone Treatment Days                           | 0.30                                                                                        | 0.20                     | 0.45 |
|            | Naltrexone Extended Release Treatment Days         | 0.56                                                                                        | 0.45                     | 0.70 |
|            | Naltrexone Oral Treatment Days                     | 0.79                                                                                        | 0.70                     | 0.88 |
|            | Muscle Relaxant Treatment Days                     | 1.17                                                                                        | 1.04                     | 1.32 |
|            | Antispasmodic Treatment Days                       | 1.04                                                                                        | 0.79                     | 1.37 |
|            | Opioid (Non Buprenorphine) Treatment Days          | 1.01                                                                                        | 0.93                     | 1.09 |
|            | Antidepressant Treatment Days                      | 0.90                                                                                        | 0.85                     | 0.95 |
|            | Mood stabilizer Treatment Days                     | 0.85                                                                                        | 0.77                     | 0.93 |
|            | Antipsychotic Treatment Days                       | 0.84                                                                                        | 0.78                     | 0.91 |
|            | Nonsteroidal anti-inflammatory drug Treatment Days | 0.98                                                                                        | 0.88                     | 1.08 |
|            | Benzodiazepine Treatment Days                      | 1.42                                                                                        | 1.32                     | 1.53 |
|            |                                                    | <b>OUD without Recent AUD Claims<br/>3795138 Person-Days among 5873 Unique Individuals)</b> |                          |      |
|            | Effect                                             | Odds Ratio                                                                                  | 95% Confidence Intervals |      |
| Model 2B.3 | Buprenorphine Treatment Days                       | 0.74                                                                                        | 0.66                     | 0.83 |
|            | Methadone Treatment Days                           | 0.36                                                                                        | 0.25                     | 0.53 |
|            | Naltrexone Extended Release Treatment Days         | 0.77                                                                                        | 0.54                     | 1.10 |
|            | Naltrexone Oral Treatment Days                     | 0.92                                                                                        | 0.74                     | 1.14 |
|            | Muscle Relaxant Treatment Days                     | 1.10                                                                                        | 0.93                     | 1.29 |

|  |                                                    |      |      |      |
|--|----------------------------------------------------|------|------|------|
|  | Antispasmodic Treatment Days                       | 1.07 | 0.77 | 1.50 |
|  | Opioid (Non Buprenorphine) Treatment Days          | 0.93 | 0.83 | 1.04 |
|  | Antidepressant Treatment Days                      | 0.84 | 0.78 | 0.91 |
|  | Mood stabilizer Treatment Days                     | 0.84 | 0.73 | 0.96 |
|  | Antipsychotic Treatment Days                       | 0.78 | 0.70 | 0.87 |
|  | Nonsteroidal anti-inflammatory drug Treatment Days | 0.93 | 0.80 | 1.08 |
|  | Benzodiazepine Treatment Days                      | 1.44 | 1.30 | 1.61 |

eTable 3 illustrates the adjusted odds of alcohol-related acute events associated with OUD medication treatment days, controlling for treatment days encompassing medications commonly found in association with alcohol poisonings: model 2B.1 (all participants), model 2B.2 (individuals with OUD and recent AUD claims), and model 2B.3 (individuals with OUD but without recent AUD claims). The results in eTable 3 correspond to Table 2 in the text. Odds ratios and 95% confidence intervals are denoted for each variable.

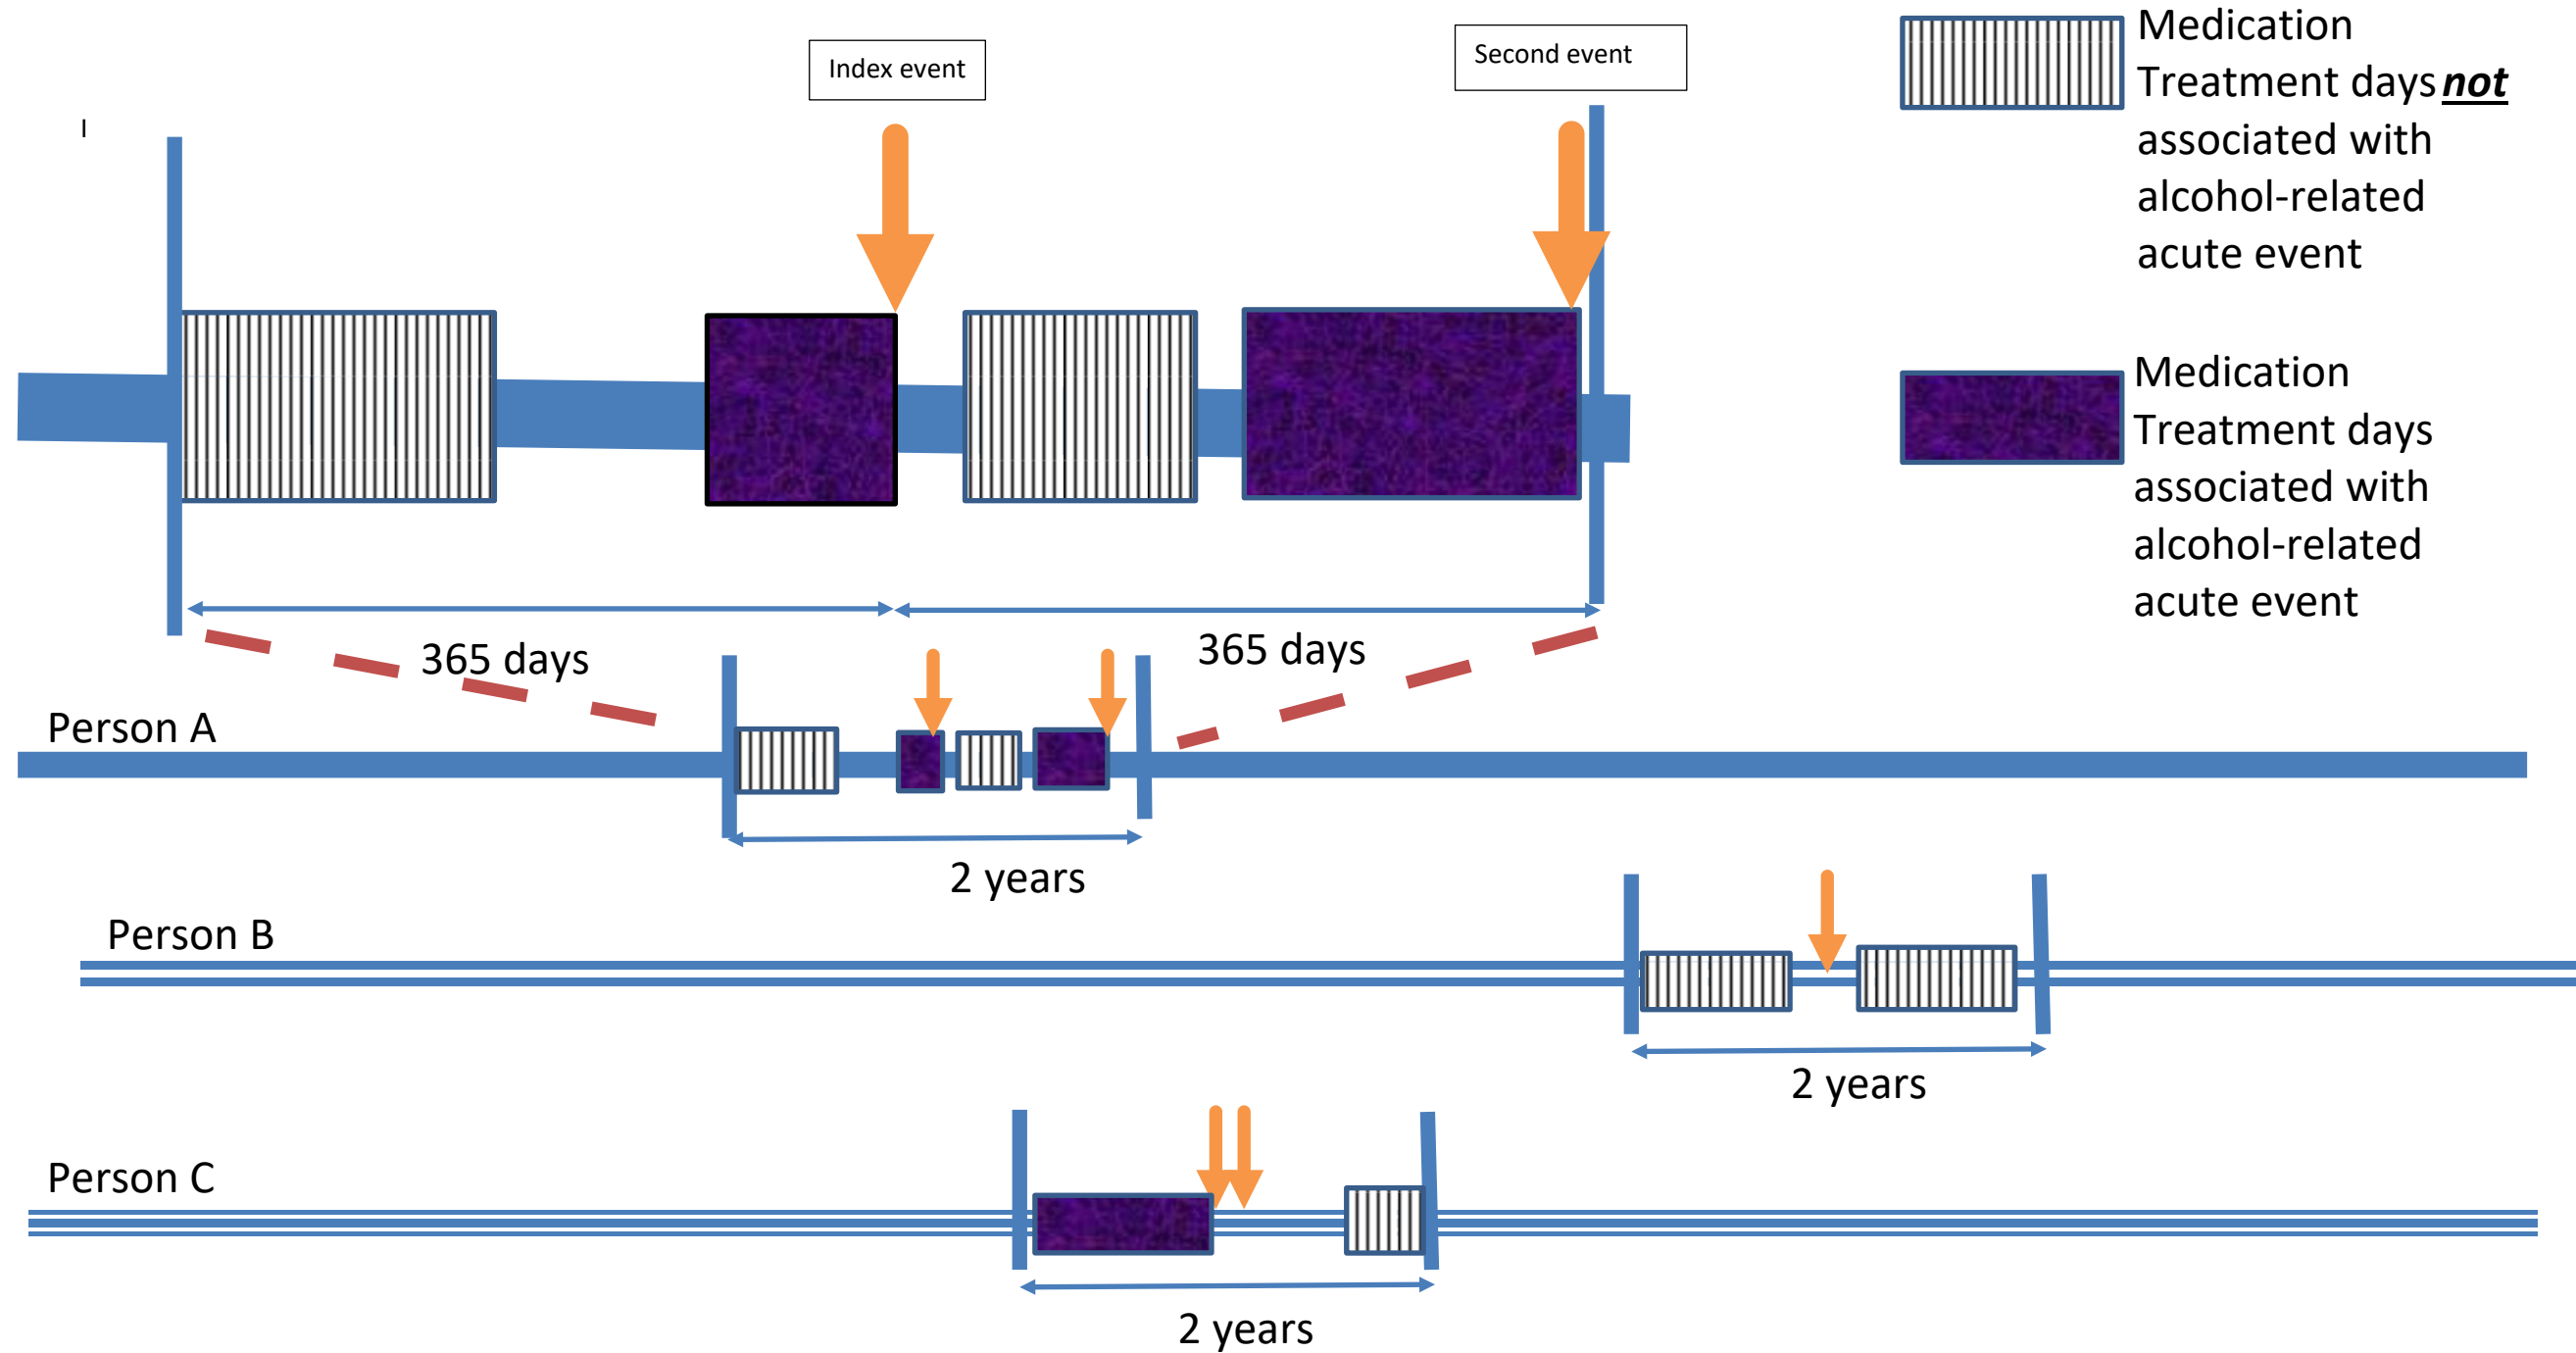

eFigure: Overview of Case-Crossover Design

The eFigure summarizes the study's case-crossover design. Alcohol-related acute events are denoted by arrows. We defined an index event as the first alcohol-related event observed in the data for that individual. An observation period spanning up to a maximum of 1 year before and 1 year after index alcohol-related acute event was selected. Each individual could thus contribute multiple alcohol-related acute events as long as they fell within a maximum of 1 year before and after the index alcohol-related acute event.

Medication treatment days (encompassing prescriptions such as buprenorphine, methadone, naltrexone ER, or naltrexone oral) are illustrated in the eFigure. Medication treatment days culminating in an alcohol-related acute event are denoted with shaded boxes, whereas treatment days not associated with an alcohol-related acute event are shown by boxes (lines/bars).

For Person A, eFigure 1 shows four medication treatment episodes, two of which culminate in an alcohol-related acute event (index event and a second event), both of which are associated with a medication treatment episode. In comparison, Person B has two medication treatment episodes, neither of which is associated with an alcohol-related acute event. Finally, Person C has two medication treatment episodes, one of which is associated with an alcohol-related acute event (index event); the second alcohol-related acute event is not associated with medication treatment episodes.
